# Supplementary material
Source: PubMed Central journal article supplement (PMC3362286)
Supplement: supp_00050.2011_suppinfo.pdf [file supp_00050.2011_suppinfo.pdf]

1 **Supporting Information**

2 *Data acquisition*

3 A commercialized, continuous-wave, functional NIR brain imager (DYNOT, NIRx  
4 Medical Technologies, USA) was used to measure hemodynamics of the rat brain. DYNOT can  
5 drive up to 31 bifurcated optical optodes and utilize two wavelengths of near infrared light (760  
6 and 830 nm). Signals at two wavelengths were acquired simultaneously and independently.  
7 During one data acquisition cycle, each optode was used as light source once, in an order from  
8 Optode 1 to the last one. When an optode served as a source, all other optodes (including the  
9 source optode itself) detected reflectance of light simultaneously at different locations. The light  
10 propagation path is illustrated in Figure 1A, where two detectors are receiving optical signals  
11 that are emitted from a source optode. The optical penetration depth is a function of the source-  
12 detector separation (Feng et al. 1995). The wider the separation, the deeper the optical signal  
13 could reach.

14

15 *Optode-array arrangement for rat brain measurement*

16 In the rat measurement, 26 optodes (2 mm in diameter) were used and arranged by a  
17 plastic frame in a horizontal plane (Figures 1B and 1C). A total number of 676 (26 X 26) data  
18 points (signals from all source-detector pairs) were gathered per each data acquisition cycle at  
19 one wavelength of light. The sampling rate was about 2 data acquisition cycles per second (2 Hz).  
20 This 26-optode array covered a rectangular region with an anterior-to-posterior distance of 16.1  
21 mm and a left-to-right distance of 16.4 mm (Figure 1C). To ensure consistency of array  
22 placement, the most posterior row of the array (Optodes 23-26) was aligned by the lambdoid  
23 suture; the two middle probes (Optodes 24 and 25) were evenly sided from the midline suture

24 (shown in Figure 1B). The last check was to make sure Optode 2 on the midline suture (Figure  
25 1B). All of the optodes were in good contact with the rat skull, and a few drops of mineral oil  
26 (Equate, US) were applied before the array placement to avoid air gap between optodes and the  
27 skull surface.

28

### 29 *Image reconstruction: tomography*

30 A NIR data processing program, HOMER (PMI, US), was used to create tomography.  
31 This software (Huppert et al. 2009) is based on a widely accepted mathematical model of diffuse  
32 light, which is based on two assumptions: (a) the light scattering coefficient ( $\mu_s'$ ) of the target  
33 (either rat brain or tissue phantom) is constant and much larger than its absorption coefficient  
34 ( $\mu_a$ ), and (b) both the spatial and temporal variation of  $\mu_a$  are small (Durduran et al. 1997; Li et  
35 al. 2004). Thus, a change in optical density ( $\Delta OD$ ) is mainly determined by the absorption  
36 changes in oxy- ( $\Delta[HbO]$ ) and deoxy- hemoglobin concentration ( $\Delta[Hb]$ ) along the photon  
37 pathway inside the tissue, as shown by Eq. 1,

$$38 \begin{bmatrix} \Delta OD_{\lambda_1} \\ \Delta OD_{\lambda_2} \end{bmatrix} = A \cdot \begin{bmatrix} \Delta[HbO] \\ \Delta[Hb] \end{bmatrix}, \quad (1)$$

39 where  $\Delta OD$  is wavelength dependent, and  $A$  is a transfer function (a constant matrix) that  
40 describes direct relationships between changes in optical densities and hemodynamic  
41 chromosphere concentrations (Kim et al. 2005; Li et al. 2004). Since Matrix  $A$  is associated  
42 with light extinction coefficients of hemoglobin and can be found in literature,  $[HbO]$  and  $[Hb]$   
43 changes could be solved by multiplying the inversed  $A$  on both sides of Eq. 1. To ensure that  
44  $[HbO]$  and  $[Hb]$  changes are solvable, two or more wavelengths of optical measures are needed.

45 A diffusion equation has been widely accepted as a photon migration model to quantify  
46 the photon density ( $P(\mathbf{r}, t)$ ) in diffusive turbid media (Arridge 1999),

47 
$$\frac{1}{c} \frac{\partial}{\partial t} P(\mathbf{r}, t) - D \nabla^2 P(\mathbf{r}, t) + \mu_a \cdot P(\mathbf{r}, t) = S(\mathbf{r}, t), \quad (2)$$

48 where  $c$  is the light speed in a tissue,  $\mathbf{r}$  a vector representing a relative distance to the origin (0,0),  
 49  $t$  the time,  $D$  the diffusion coefficient, and  $S$  the light source. According to Eq. 2, a photon  
 50 density at any 3-D location and any time can be determined if all other variables are known. In  
 51 other words, Eq. 2 describes a quantitative relationship between a regional photon density and  
 52 the light source.

53 In our study, the measured changes (i.e.,  $\Delta OD$ ) by various source-detector pairs can be  
 54 written as,

55 
$$\begin{bmatrix} \Delta OD(\text{Ch } 1) \\ \dots \\ \Delta OD(\text{Ch } n) \end{bmatrix}_{z=0} = B \cdot \begin{bmatrix} \Delta S(x_1, y_1) & \dots & \Delta S(x_1, y_m) \\ \dots & \dots & \dots \\ \Delta S(x_l, y_1) & \dots & \Delta S(x_l, y_m) \end{bmatrix}_{z=k}, \quad (3)$$

56 where  $\Delta OD(\text{Ch } i)$  is a change in optical density captured by a detector at the tissue surface ( $z = 0$ )  
 57 from a source-detector pair, labeled as channel  $i$  ( $i = 1 \dots n$ );  $B$  is a transfer function determined by  
 58 Eq. 2;  $\Delta S$  is a perturbation distribution in  $\mu_a$  at a certain depth along  $z$ -axis ( $z = k$ ) inside the  
 59 tissue. Eq. 3 indicates that if an absorption perturbation distribution is known, respective changes  
 60 in optical density measured from different source-detector pairs at the tissue surface ( $z = 0$ ) can  
 61 be determined. Inversely, from a backward perspective, a tissue absorption perturbation map is  
 62 solvable under two conditions: changes in optical density are known or measured at the air-tissue  
 63 boundary ( $z = 0$ ); and the inverse of Matrix  $B$  exists. However, solving Eq. (3) inversely is ill-  
 64 posed due to a limited number of optical measurements the surface and the strong attenuation of  
 65 light in deeper tissue. One of solutions to the inverse problem is to regularize Matrix  $B$ . In our  
 66 study, a regularization method was selected in HOMER (Li et al. 2004). After the tissue

67 absorption perturbation map at a chosen depth is obtained, changes in hemodynamic parameters,  
68 such as  $\Delta[\text{HbO}]$  and  $\Delta[\text{Hb}]$ , at each pixel can be further determined by Eq. 1.

69 The general scheme to produce a tomographic image of the rat's brain was to: (a) convert  
70 the DYNOT outputs to a specific format to be compatible with HOMER; (b) normalize each  
71 channel with respect to the co-located source-detector channel (i.e., source-detector separation =  
72 0 for the latter channel); (c) adjust contra-and-ipsilateral presentations (i.e., always put the left  
73 side of image as the contralateral); (d) set a low pass filter with a cutoff frequency at 0.1 Hz; (e)  
74 set the 5-s measure before stimulation as baseline; (f) for mechanical stimuli, average 5  
75 consecutive blocks for each animal; (g) determine a reconstruction depth for a specific region of  
76 interest; (h) generate reconstructed images (21-by-21-pixels) at two wavelengths, respectively;  
77 and (i) use Eq. 1 to get hemodynamic responses in terms of  $\Delta[\text{HbO}]$ ,  $\Delta[\text{Hb}]$ , and  $\Delta[\text{HbT}]$  (i.e.,  
78  $\Delta[\text{HbO}] + \Delta[\text{Hb}]$ ) in an arbitrary unit. The pixel size was  $0.77 \times 0.78 \text{ mm}^2$  (divide the  $x$ - or  $y$ -  
79 axis length by 21). All processing procedures were completed in either HOMER or Matlab  
80 (MathWorks, US).

81

### 82 *Image reconstruction: topography*

83 Topography is a simple way to interpret hemodynamic responses. As shown in Figure 1A,  
84 the signal from one source-detector pair reflects general hemodynamic responses within the  
85 associated banana-shaped photon path. By using properly selected pairs, a 2-D hemodynamic  
86 response image can be obtained. One assumption is made that the light intensity change is  
87 primarily due to the absorption perturbation, but not due to the light scattering change.

88 Twelve source-detector pairs were used (Figure 1D). Of those pairs, Optodes 10, 15, and  
89 20 (on the midline) served as sources, and the rest of the chosen optodes (Optodes 1, 4, 8, 13, 18,

90 23 on the left and Optodes 3, 7, 12, 17, 22, and 26 on the right) acted as detectors (Figure 1B).  
91 The distance between the sources and detectors ranged from 6.5 to 8.2 mm. The brain image was,  
92 therefore, divided into 12 subdivisions (Figure 1D). Hemodynamic responses in each subdivision  
93 were only determined by one geometrically affiliated source-detector pair. The signal change in a  
94 subdivision represents a comprehensive effect of all local optical property changes (i.e.,  
95 absorption) along the full length of the photon pathway depicted in Figure 1A.

96 The general scheme to produce a topography image was to: (a) convert the DYNOT  
97 outputs into logarithmic values for each of different source-detector pairs; (b) normalize each  
98 channel by subtracting the baseline measure (i.e., the median value of 5-s measure prior to  
99 injection); (c) run a median filter (every 20 data points, or 10 s); (d) adjust contra-and-ipsilateral  
100 presentations (i.e., always align the left side of an image as the contralateral); and (e) use Eq. 1 to  
101 obtain the hemodynamics. Temporal resolution of the topographic image was then reset at 10 s  
102 (0.1 Hz) due to the temporal averaging (i.e., the median filter). Topography was generated in  
103 Matlab.

104

#### 105 *Depth location of an activated area in NIR tomography*

106 It is important to realize that the current fNIRI results in only 2-D imaging and is capable to form  
107 only lateral images accurately, without the ability to localize the depth of activation. In general,  
108 the depth localization of brain activation is pre-determined or chosen approximately based on  
109 actual human or animal neural anatomy (Boas and Dale 2005) with the assumption that the  
110 hemodynamic changes come only from the cortical (for both human and animal) and sub-cortical  
111 (for animal only) structures. In addition, recent efforts have been made in developing  
112 regularization-modified algorithms in order to quantify depth localization and thus to form 3D

113 fNIRI images (Culver et al. 2003; Niu et al. 2010b; Pogue et al. 1999). However, this study  
114 does not plan to involve such mathematical advancement and fuses on 2D-based fNIRI.  
115 Specifically, based on rat's brain anatomy, we selected depth= $\sim$ 5 mm during image  
116 reconstructions to form respective fNIR images at statistically significant levels (Figs. 2 and 3 in  
117 the paper).

118         Although our method (using a 26-optode array) can detect a cerebrovascular perturbation  
119 up to 1 cm below the rat's dorsal skull, which is supported by both theoretical calculations (Feng  
120 et al. 1995) and tissue phantom experiments (data not shown), we are not able to provide the  
121 exact physical depth where a hemodynamic response occurred in 2D tomography. Thus, our  
122 current work focused on the performance of fNIR and the interpretation of fNIR-based  
123 hemodynamics on the lateral plane. Facing the limitation of the depth resolution, we dampened  
124 discussions on individual regions of interest, but emphasized a synergistic picture of several  
125 regions of interest in response to different peripheral stimulations. In fact, the depth specificity of  
126 fNIR-based hemodynamics is under active research. A recent development (Niu et al. 2010a;  
127 Niu et al. 2010b) has introduced a depth compensation algorithm (DCA) to counterbalance the  
128 decay nature of light propagation in tissue. Our future studies will validate some advanced  
129 reconstruction methods to process the *in vivo* data, and promote this technology as an alternative  
130 neuroimaging tool with a capability to produce 3D tomography.

131  
132

133

134

135

136

137 **References**

138

139 **Arridge SR.** Optical tomography in medical imaging. *Inverse Problems* 15: R41-R93, 1999.

140 **Boas DA and Dale AM.** Simulation study of magnetic resonance imaging-guided cortically  
141 constrained diffuse optical tomography of human brain function. *Appl Opt* 44: 1957-1968, 2005.

142 **Culver JP, Durduran T, Furuya D, Cheung C, Greenberg JH and Yodh AG.** Diffuse optical  
143 tomography of cerebral blood flow, oxygenation, and metabolism in rat during focal ischemia. *J*  
144 *Cereb Blood Flow Metab* 23: 911-924, 2003.

145 **Durduran T, Yodh AG, Chance B and Boas DA.** Does the photon-diffusion coefficient depend  
146 on absorption? *J Opt Soc Am A Opt Image Sci Vis* 14: 3358-3365, 1997.

147 **Feng S, Zeng F-A and Chance B.** Photon migration in the presence of a single defect: a  
148 perturbation analysis. *Appl Opt* 34: 3826-3837, 1995.

149 **Huppert TJ, Diamond SG, Franceschini MA and Boas DA.** HomER: a review of time-series  
150 analysis methods for near-infrared spectroscopy of the brain. *Appl Opt* 48: D280-D298, 2009.

151 **Kim JG, Xia M and Liu H.** Extinction coefficients of hemoglobin for near-infrared  
152 spectroscopy of tissue. *IEEE Eng Med Biol Mag* 24: 118-121, 2005.

153 **Li A, Zhang Q, Culver JP, Miller EL and Boas DA.** Reconstructing chromosphere  
154 concentration images directly by continuous-wave diffuse optical tomography. *Opt Lett* 29: 256-  
155 258, 2004.

156 **Niu H, Lin ZJ, Tian F, Dhamne S and Liu H.** Comprehensive investigation of three-  
157 dimensional diffuse optical tomography with depth compensation algorithm. *J Biomed Opt* 15:  
158 046005, 2010a.

159 **Niu H, Tian F, Lin ZJ and Liu H.** Development of a compensation algorithm for accurate  
160 depth localization in diffuse optical tomography. *Opt Lett* 35: 429-431, 2010b.

161 **Paxinos GWC.**In: The Rat Brain in Stereotaxic Coordinates, San Diego, CA: Academic Press,  
162 1998.

163 **Pogue BW, McBride TO, Prewitt J, Osterberg UL and Paulsen KD.** Spatially variant  
164 regularization improves diffuse optical tomography. *Appl Opt* 38: 2950-2961, 1999.

165

166

167

168

169

170

171

172

173

174

175

176

177

178

179

180

181

182



183 **Figure Caption**

184 Figure 1. General information on optical theory and instrumentations. **A.** Light propagation paths  
185 from a source optical probe to two detectors. Photons initially enter into the tissue, traveling  
186 through a banana-like pathway, and finally emit out which is sensed by detectors. **B.** The  
187 placement of the optode array (containing 26 optodes) above the rat's skull (Paxinos 1998). **C.**  
188 Physical dimensions of the 26-optode array and the image orientation: rostral, caudal, contra-,  
189 and ipsilateral. In particular, the ipsilateral side is the right.

190

191
