# Supplementary material
Source: PubMed Central journal article supplement (PMC3362286)

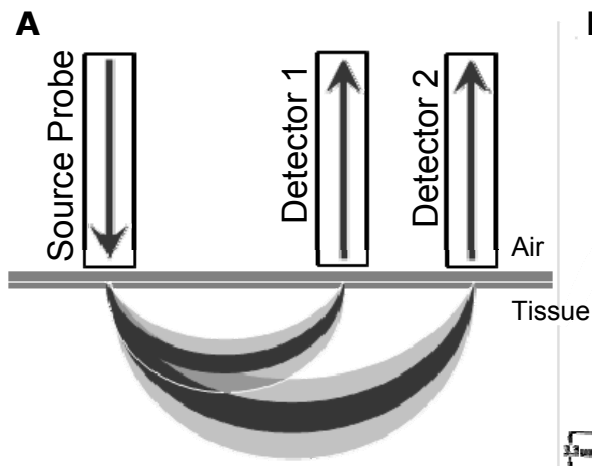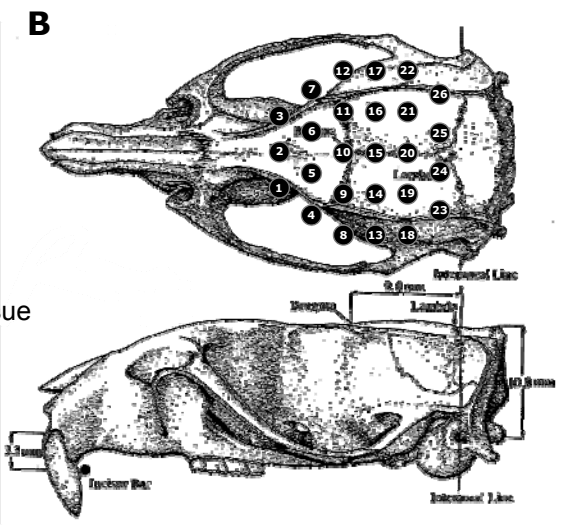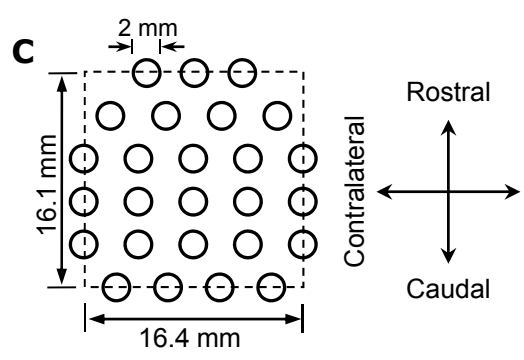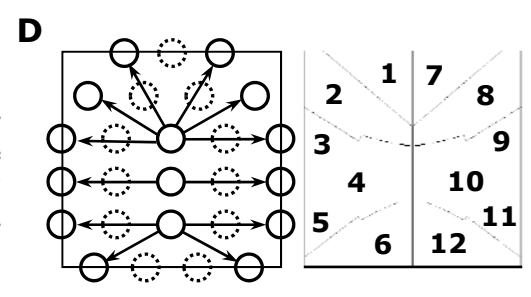

Supplement: supp_00050.2011_figS1.pdf [file supp_00050.2011_figS1.pdf]
